# Supplementary material for: Biosynthesis of C4–C8 3-Hydroxycarboxylic Acids from Glucose through the Inverted Fatty Acid β-Oxidation by Metabolically Engineered Escherichia coli
Source: MDPI journal article supplement (doi:10.3390/biom14040449), 2024-04-07
Supplement: s1 [file s1]

**Table S1.**

Primers used in the study.

| Primer | Sequence 5'→3'                                                          |
|--------|-------------------------------------------------------------------------|
| P1     | 5'-ttccgtgccgccgcagcggacacgttattgattctg-cgctcaagttagtataaaaaagctgaac-3' |
| P2     | 5'-gcgtcgcggttgggatgaataccgtcatcctgcac-tgaagcctgctttttataactaagttgg-3'  |
| P3     | 5'-tgcgac-agatct-ctcacctaccaacaatgcc-3'                                 |
| P4     | 5'-atgtatatctccttc-acggccaatgcttcgttc-3'                                |
| P5     | 5'-ctagta-agatct-tgaagcctgctttttataactaagttgg-3'                        |
| P6     | 5'-tacgaccagatcaccttgcggattcaggagactgac-cgctcaagttagtataaaaaagctgaac-3' |
| P7     | 5'-gtggtcagacctcctacaagtaaggggcttttcgtt-cgctcaagttagtataaaaaagctgaac-3' |
| P8     | 5'-caggcacaacaagcatcaacaataaggattaaagct-cgctcaagttagtataaaaaagctgaac-3' |
| P9     | 5'-ccggttggcgacctgaaaacggcttaaggagtcaca-cgctcaagttagtataaaaaagctgaac-3' |
| P10    | 5'-ccagtcaaggtacagggtgtcgcctttgtaaagcat-atgtatatctccttcacggccaatg-3'    |
| P11    | 5'-caggacaaccgtagcgcgagaatactcaaaatcatcat-atgtatatctccttcacggccaatg-3'  |
| P12    | 5'-ggttaccagaatgcgcttaccggaaaagaaacccat-atgtatatctccttcacggccaatg-3'    |
| P13    | 5'-ggtgcaattgcacgacaatgacaacctgttccat-atgtatatctccttcacggccaatg-3'      |
| P14    | 5'-gtgaggatggagagttcatgc-3'                                             |
| P15    | 5'-caattccactggaacatccgg-3'                                             |
| P16    | 5'-cgtgatcagatcggcatttc-3'                                              |
| P17    | 5'-gttcggcaatgccatcttcc-3'                                              |
| P18    | 5'-catcacaagtggtcagacctcc-3'                                            |
| P19    | 5'-cagactgctgataaataagctcac-3'                                          |
| P20    | 5'-gcaactatagctactcacagccag-3'                                          |
| P21    | 5'-gtaggtgaatgccagttcagctc-3'                                           |
| P22    | 5'-gaaggtctgcgtaataaagcg-3'                                             |
| P23    | 5'-cttctgcacgcacgttacg-3'                                               |
